# Supplementary material for: Parents and Mobile Devices, from Theory to Practice: Comparison between Perception and Attitudes to 0–5 Year Old Children’s Use
Source: MDPI journal article supplement (doi:10.3390/ijerph18073440), 2021-03-26
Supplement: s1 [file s1]

## **Supplementary file: Questionnaire**

### **A: Sociodemographic characteristics**

1. Do you agree to participate in this research?
  - ☐ Yes
  - ☐ No
2. Gender
  - ☐ M
  - ☐ F
3. Age \_\_\_\_\_
4. Educational qualification
  - ☐ Primary school certificate
  - ☐ Secondary school certificate
  - ☐ High school diploma
  - ☐ University Degree / Master
5. Employment
  - ☐ Student
  - ☐ Housewife
  - ☐ Employee
  - ☐ Self-employed
  - ☐ Retired
  - ☐ Unemployed
6. Country of origin
  - ☐ Italy
  - ☐ Other \_\_\_\_\_

### **B. Questions addressed to all participants**

7. How many Mobile Digital Devices (smartphone or tablet) do you use every day?
  - ☐ None
  - ☐ 1
  - ☐ 2
  - ☐ 3
  - ☐ More than 3
8. How many hours do you spend, overall, in front of your smartphone / tablet during the day? \_\_\_\_\_
9. In your opinion, does the use of smartphones and / or tablets by a preschooler (0-5 years old), pose a risk to his/her health?
  - ☐ Yes
  - ☐ No
  - ☐ I don't know

10. If yes, how harmful do you think it is on a scale of 1 to 7? (1 = *not harmful*; 7 = *very much harmful*)

☐ 1   ☐ 2   ☐ 3   ☐ 4   ☐ 5   ☐ 6   ☐ 7

11. How long do you think it is correct the use of a smartphone and / or tablet, during the day, for:

- A child aged under 2 year.
  - \_\_\_\_\_(minutes)
  - I don't know
- A child aged 3-5 years old.
  - \_\_\_\_\_(minutes)
  - I don't know

12. Referring to the use of smartphone and / or tablet by a preschooler, how much is, in your opinion, the risk of:

(Scale of 1 to 7; 1 = not at all risky; 7 = extremely risky)

- Having sleep disorders  
☐ 1   ☐ 2   ☐ 3   ☐ 4   ☐ 5   ☐ 6   ☐ 7   ☐ I don't know
- Becoming obese  
☐ 1   ☐ 2   ☐ 3   ☐ 4   ☐ 5   ☐ 6   ☐ 7   ☐ I don't know
- Becoming epileptic  
☐ 1   ☐ 2   ☐ 3   ☐ 4   ☐ 5   ☐ 6   ☐ 7   ☐ I don't know
- Having eye irritation  
☐ 1   ☐ 2   ☐ 3   ☐ 4   ☐ 5   ☐ 6   ☐ 7   ☐ I don't know
- Becoming celiac  
☐ 1   ☐ 2   ☐ 3   ☐ 4   ☐ 5   ☐ 6   ☐ 7   ☐ I don't know
- Confusing virtual reality with the real world  
☐ 1   ☐ 2   ☐ 3   ☐ 4   ☐ 5   ☐ 6   ☐ 7   ☐ I don't know

13. Referring to the use of smartphone and / or tablet by a preschooler, how much is, in your opinion, the risk of:

(Scale of 1 to 7; 1 = no benefit at all; 7 = high benefit)

- Learning new words (for children aged under 2 years old)  
☐ 1   ☐ 2   ☐ 3   ☐ 4   ☐ 5   ☐ 6   ☐ 7   ☐ I don't know
- Learning new words (for children aged 3-5 years old)  
☐ 1   ☐ 2   ☐ 3   ☐ 4   ☐ 5   ☐ 6   ☐ 7   ☐ I don't know
- Developing cognitive/creative skills

☐ 1   ☐ 2   ☐ 3   ☐ 4   ☐ 5   ☐ 6   ☐ 7   ☐ I don't know

- Preventing ADHD (Attention Deficit and Hyperactivity Disorder)

☐ 1   ☐ 2   ☐ 3   ☐ 4   ☐ 5   ☐ 6   ☐ 7   ☐ I don't know

- Communicating with distant relatives

☐ 1   ☐ 2   ☐ 3   ☐ 4   ☐ 5   ☐ 6   ☐ 7   ☐ I don't know

- Approaching technology

☐ 1   ☐ 2   ☐ 3   ☐ 4   ☐ 5   ☐ 6   ☐ 7   ☐ I don't know

14. Do you have children?

- ☐ No
- ☐ Yes

### C. Questions addressed to preschoolers' parents

15. If yes, do you have preschool children (0-5 years old)?

- ☐ No
- ☐ Yes

16. If yes, how old are they?

Child 1 \_\_\_\_\_

Child 2 \_\_\_\_\_

Child 3 \_\_\_\_\_

Etc.

17. Do you usually let your child use the smartphone and / or tablet?

- ☐ Yes
- ☐ No

18. If yes, how long per day? \_\_\_\_\_

19. Do you let him/her use it alone?

- ☐ Yes
- ☐ No

20. If yes, how long do you let him use alone?

- ☐ Less than half the time
- ☐ About half the time
- ☐ More than half the time

21. Has the child ever requested the device from you, if he is able to?

- ☐ Yes
- ☐ No

22. If yes, for what reason? (*More than one answer allowed*)

- ☐ Playing
- ☐ Using educational apps
- ☐ Taking pictures

- Watching videos
  - Watching cartoons / TV series
  - Other \_\_\_\_\_
23. When it is time to stop using your smartphone or tablet, does your child annoys and try to oppose?
- Yes
  - No
24. If you give your child the smartphone and / or tablet, what is the main reason?  
(Only one answer)
- To make him/her feel good
  - To make him/her stop crying
  - Because it favors his/her cognitive development
  - To approach him/her to technology
  - To distract him/her while I do cleaning, work, focus on other things
  - To communicate with relatives / friends (e.g. videochat)
  - Other \_\_\_\_\_
25. Have you ever sought or received information about risks associated with using smartphone / tablet?
- Yes
  - No
26. If yes, what was the source of information? (More than one answer allowed)
- Website/social media
  - Meetings organized by Municipality
  - Meetings organized by Schools
  - Pediatrician
  - Other \_\_\_\_\_

N.B. The original questionnaire was in Italian language.
